# Supplementary material for: A Kinetic Model Considering Catalyst Deactivation for Methanol-to-Dimethyl Ether on a Biomass-Derived Zr/P-Carbon Catalyst
Source: MDPI journal article supplement (doi:10.3390/ma15020596), 2022-01-13
Supplement: s1 [file s1]

Article

# A Kinetic Model Considering Catalyst Deactivation for Methanol-to-Dimethyl Ether on a Biomass-Derived Zr/P-Carbon Catalyst

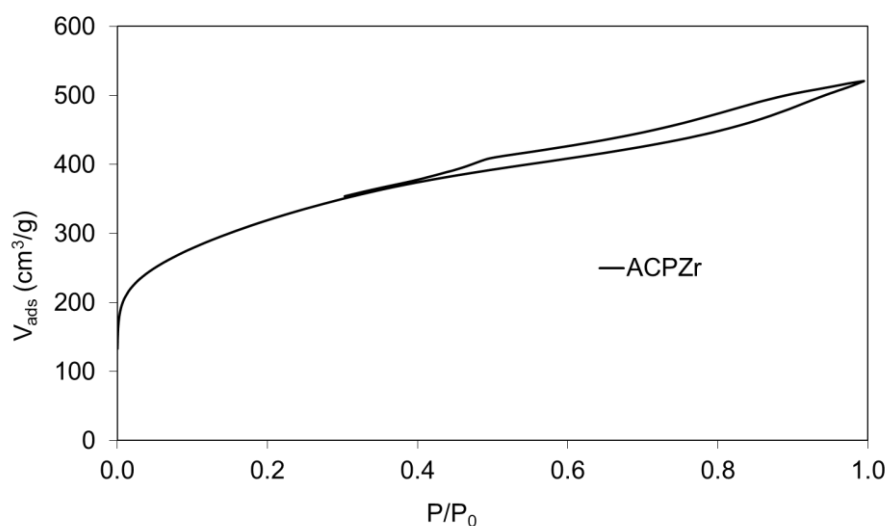

**Figure S1.** N<sub>2</sub> adsorption-desorption isotherm at -196 °C of fresh catalyst.

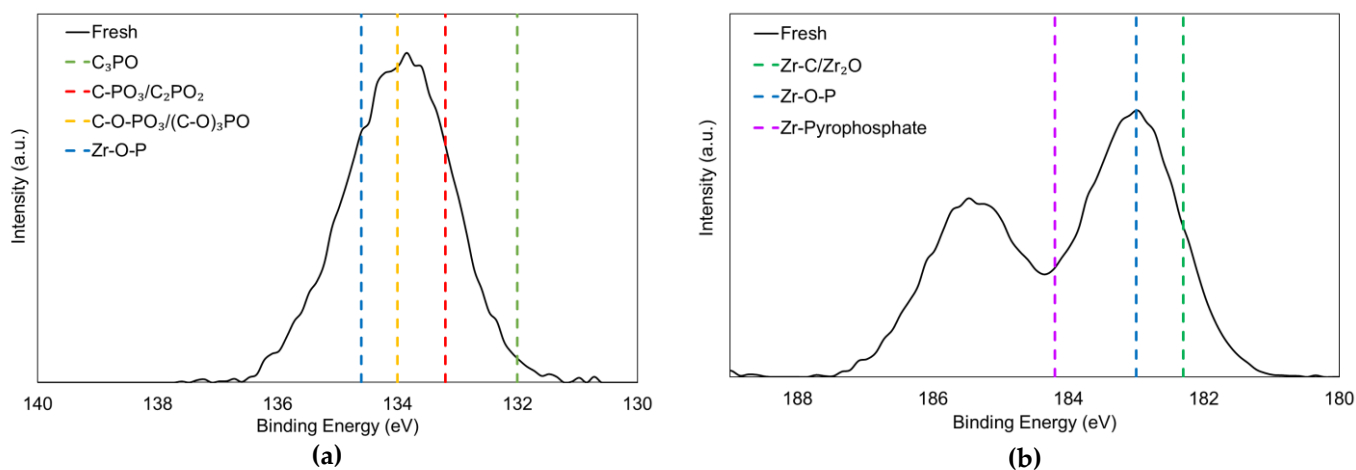

**Figure S2.** XPS spectra of (a) P2p and (b) Zr3d of fresh catalyst.

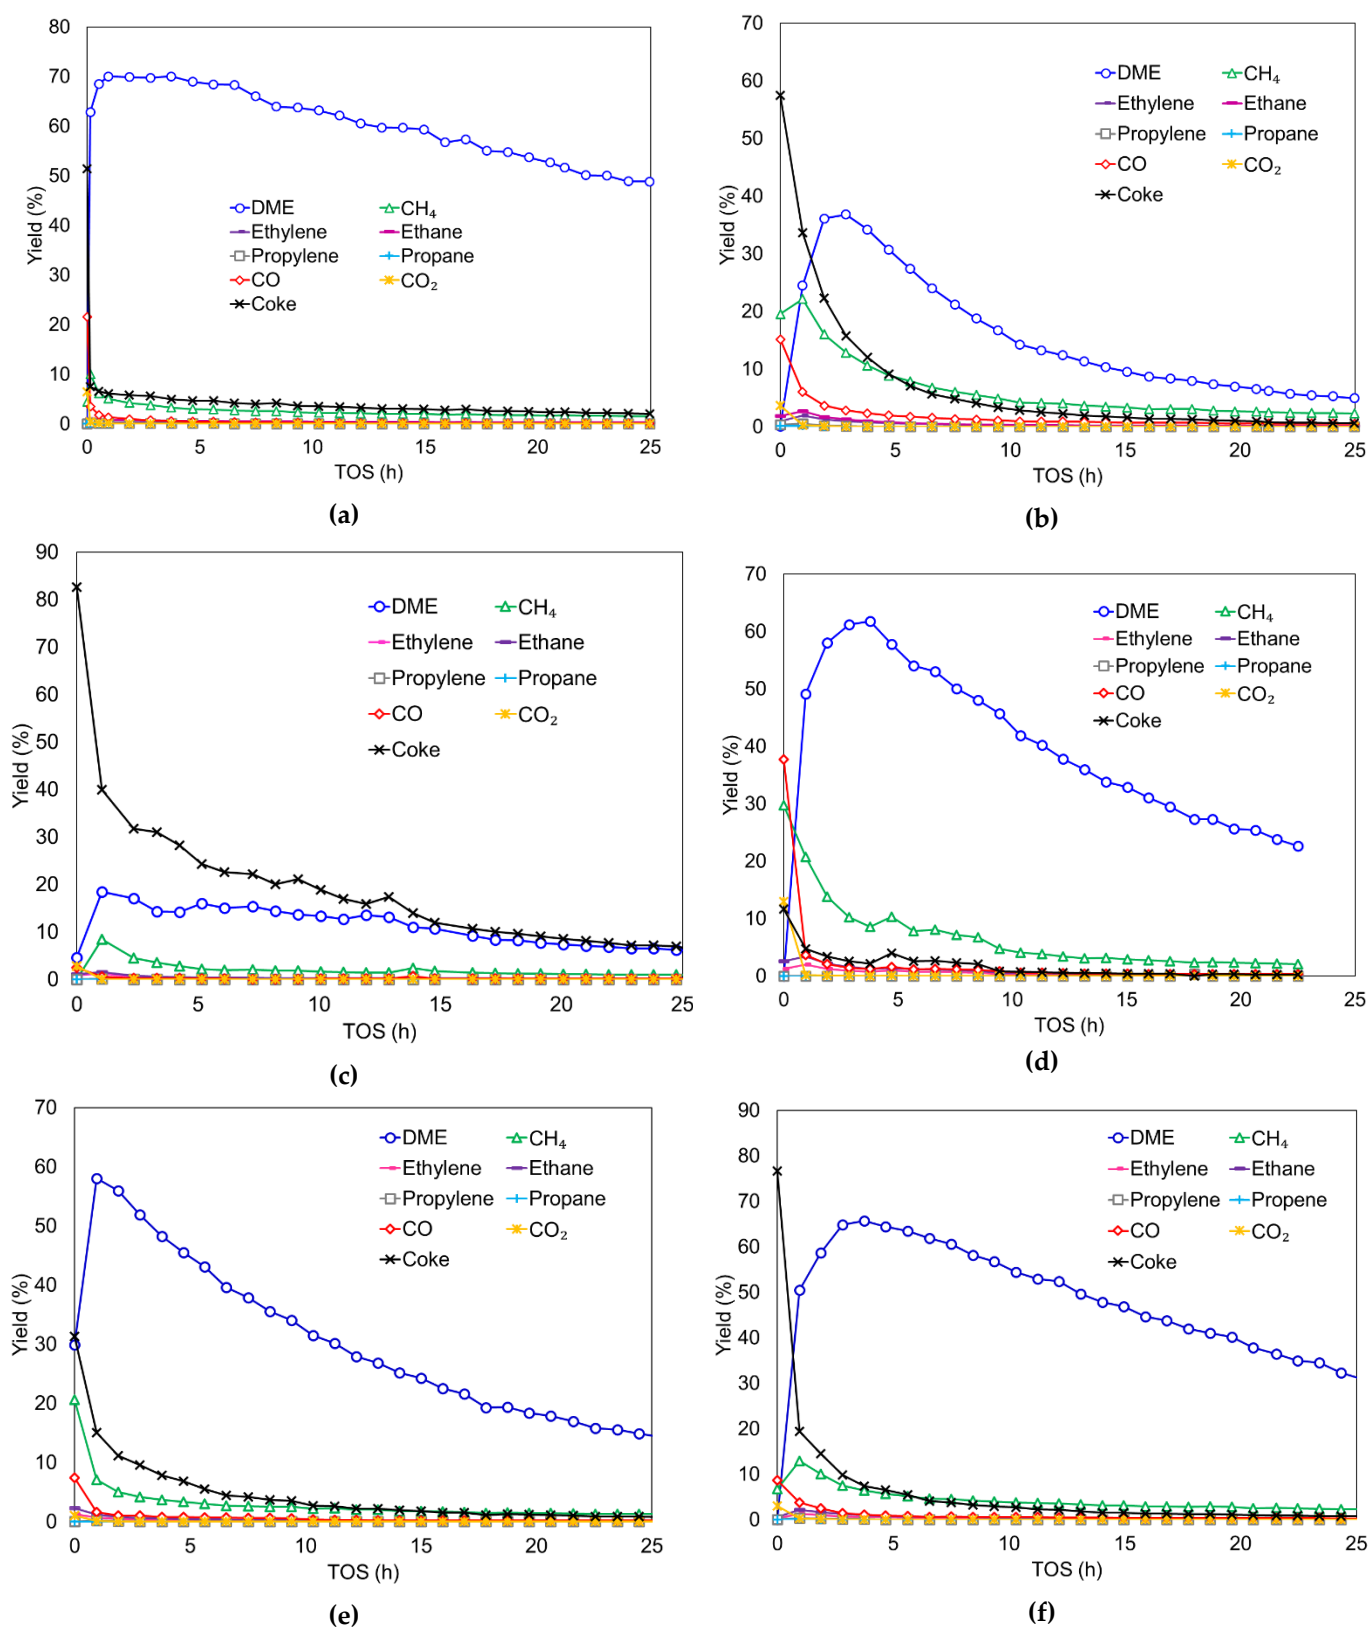

**Figure S3.** Yield to different products as a function of TOS at different operating conditions in the MTD reaction. (a) 450 °C, 0.04 atm<sub>CH<sub>3</sub>OH</sub> and 75 g<sub>cat</sub>/mmol<sub>CH<sub>3</sub>OH</sub> (b) 550 °C, 0.04 atm<sub>CH<sub>3</sub>OH</sub> and 75 g<sub>cat</sub>/mmol<sub>CH<sub>3</sub>OH</sub> (c) 500 °C, 0.015 atm<sub>CH<sub>3</sub>OH</sub> and 75 g<sub>cat</sub>/mmol<sub>CH<sub>3</sub>OH</sub> (d) 500 °C, 0.08 atm<sub>CH<sub>3</sub>OH</sub> and 75 g<sub>cat</sub>/mmol<sub>CH<sub>3</sub>OH</sub> (e) 500 °C, 0.04 atm<sub>CH<sub>3</sub>OH</sub> and 50 g<sub>cat</sub>/mmol<sub>CH<sub>3</sub>OH</sub> (f) 500 °C, 0.04 atm<sub>CH<sub>3</sub>OH</sub> and 100 g<sub>cat</sub>/mmol<sub>CH<sub>3</sub>OH</sub>.

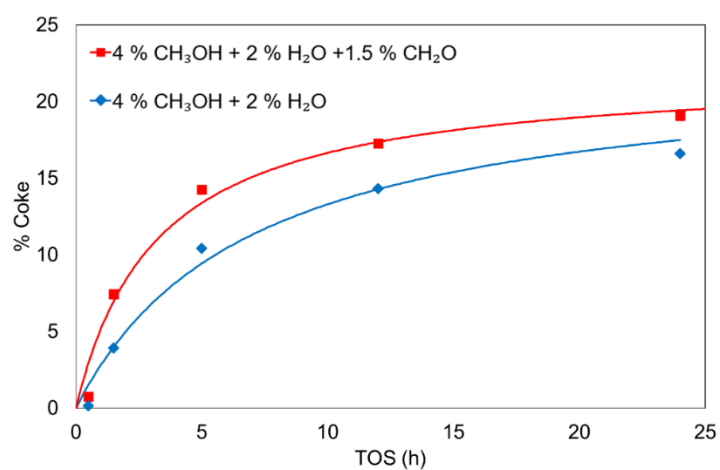

**Figure S4.** Coke content as a function of TOS for methanol + water fed and methanol + water + formaldehyde; temperature 500 °C and space time of 75 gcat-s/mmolCH<sub>3</sub>OH. Experimental data (points) and calculated (lines).
